## Addendum

**Addendum: Site of analysis matters - Ongoing complete response to Nivolumab in a patient with HIV/HPV related metastatic anal cancer and *MLH1* mutation****Melanie Demes<sup>1,2</sup>, Ursula Pession<sup>2,3</sup>, Jan Jeroch<sup>1</sup>, Falko Schulze<sup>1,2</sup>, Katrin Eichler<sup>2,4</sup>, Daniel Martin<sup>2,5</sup>, Peter Wild<sup>1,2</sup> and Oliver Waidmann<sup>2,6,7</sup>**<sup>1</sup>Dr. Senckenbergisches Institut für Pathologie, Universitätsklinikum Frankfurt, Frankfurt 60590, Germany<sup>2</sup>Universitäres Centrum für Tumorerkrankungen (UCT), Universitätsklinikum Frankfurt, Frankfurt 60590, Germany<sup>3</sup>Klinik für Allgemein- und Viszeralchirurgie, Universitätsklinikum Frankfurt, Frankfurt 60590, Germany<sup>4</sup>Institut für Diagnostische und Interventionelle Radiologie, Universitätsklinikum Frankfurt, Frankfurt 60590, Germany<sup>5</sup>Klinik für Strahlentherapie und Onkologie, Universitätsklinikum Frankfurt, Frankfurt 60590, Germany<sup>6</sup>Medizinische Klinik 1, Schwerpunkte Gastroenterologie und Hepatologie, Universitätsklinikum Frankfurt, Frankfurt 60590, Germany<sup>7</sup>Centrum für Hämatologie und Onkologie, Frankfurt 60389, Germany**Published:****Copyright:** © 2023 Demes et al. This is an open access article distributed under the terms of the [Creative Commons Attribution License](https://creativecommons.org/licenses/by/4.0/) (CC BY 4.0), which permits unrestricted use, distribution, and reproduction in any medium, provided the original author and source are credited.**This article has an addendum:** No funding was used for this publication.Original article: Oncotarget. 2022; 13:1034–1042. <https://doi.org/10.18632/oncotarget.28274>
